# Supplementary material
Source: Elsevier journal article supplement (https://www.sciencedirect.com/science/article/pii/S2529984022000386)
Supplement: mmc1 [file S2529984022000386:mmc1.docx]

**Anexo.-** Estructura y contenidos del plan formativo teórico-práctico

| **Formación teórica*** | | **Formación práctica**** |
| --- | --- | --- |
| **Día 1**  **(8-14h)** | **Día 2**  **(8-14h)** | **Día 1**  **(8-14h)** |
| - Organización y estructura de la Unidad de Cuidados Intensivos Pediátricos - Actividades al ingreso y durante traslado interhospitalario:monitorización invasiva y no invasiva - Catéteres frecuentes en Unidad de Cuidados Intensivos Pediátricos | - Nociones básicas de farmacología en pediatría - Atención al paciente con patología respiratoria: ventilación mecánica invasiva y no invasiva - Manejo integral y cuidados básicos del paciente pediátrico postoperado de cirugía cardiovascular - Manejo integral y cuidados básicos del paciente pediátrico postoperado de patología traumatológica: escoliosis - Manejo integral y cuidados básicos del paciente pediátrico postoperado neurocirugía: craneoestenosis - Actuación enfermera en situaciones de riesgo vital en pediatría | **Caso 1: Paciente pediátrico afecta de bronquiolitis**   - Manejo básico del material de Oxigenoterapia de Alto Flujo (OAF), - Montaje y manejo básico Ventilación Mecánica No Invasiva (VMNI) - Preparación del material y medicación para intubación orotraqueal - Montaje y manejo básico del ventilador de Ventilación Mecánica Invasiva (VMI)   **Caso 2: Paciente con shock séptico**   - Preparación del box y recepción del ingreso con ventilación mecánica - Manejo básico de un paciente en shock y preparación de medicación vasopresora e inotrópica - Preparación de material para colocación de catéter venoso central (CVC) y sondaje vesical (SV) - Medidas básicas para prevención de infección nosocomial - Preparación de medicación de reanimación |

Fuente: Elaboración propia

*Se llevó a cabo en una sala de enfermería ubicada en la UCIP contexto de estudio

** Realizado en la sala de SC que existe en la UCIP contexto y empleando un maniquí SimBaby de Laerdal®
